# Supplementary material
Source: PubMed Central journal article supplement (PMC7359927)
Supplement: NIHMS1578684-supplement-Supplemental_Material.pdf [file NIHMS1578684-supplement-Supplemental_Material.pdf]

**SUPPLEMENTAL MATERIAL**

**Supplemental Figure 1. Funnel Plot to Assess Small-Study Effects (Fixed Effects Model)**

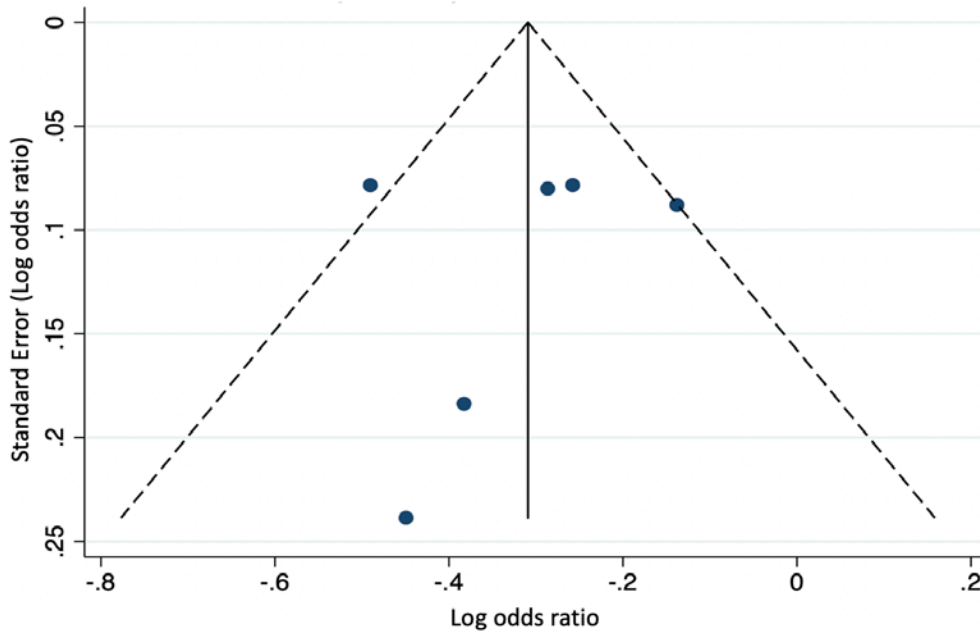

**Supplemental Figure 2. Contour Enhanced Funnel Plot to Assess Publication or Reporting Bias**

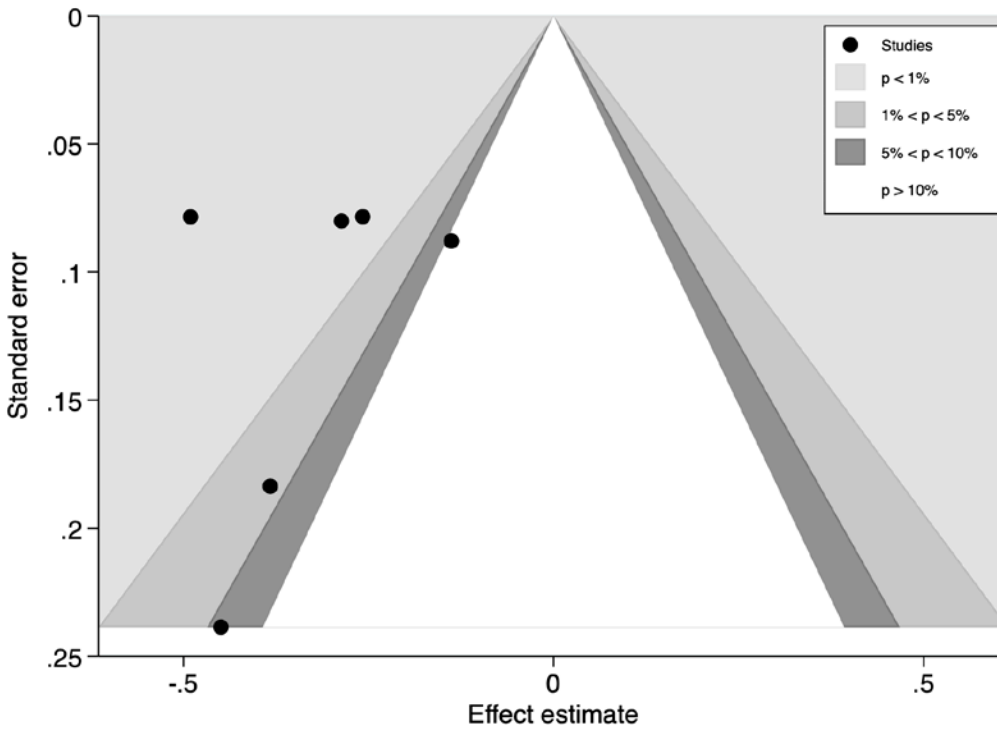

## Supplemental Table 1. Detailed Search Strategy

Ovid MEDLINE(R) ALL 1946 to Sept 3, 2019

| #         | Searches                                | Results    |
|-----------|-----------------------------------------|------------|
| 1         | atrial fibrillation/                    | 51334      |
| 2         | catheter ablation/                      | 30433      |
| 3         | pulmonary veins/                        | 13536      |
| 4         | radiofrequency ablation/                | 440        |
| 5         | 2 or 3 or 4                             | 41293      |
| 6         | (tim* adj3 ablat*).tw.                  | 1650       |
| 7         | (diagnos* adj3 ablat*).tw.              | 292        |
| 8         | DAT.tw.                                 | 7293       |
| 9         | (tim* adj3 (ablat* and diagnos*)).tw.   | 1007       |
| 10        | ((diagnosis-to-ablation) adj3 time).tw. | 5          |
| 11        | 6 or 7 or 8 or 9 or 10                  | 10132      |
| <b>12</b> | <b>1 and 5 and 11</b>                   | <b>378</b> |

Embase 1974 to 2019 August 30

| #         | Searches                                | Results    |
|-----------|-----------------------------------------|------------|
| 1         | atrial fibrillation/                    | 51489      |
| 2         | catheter ablation/                      | 32809      |
| 3         | pulmonary vein isolation/               | 8040       |
| 4         | radiofrequency ablation/                | 30920      |
| 5         | 2 or 3 or 4                             | 64877      |
| 6         | (tim* adj3 ablat*).tw.                  | 3601       |
| 7         | (diagnos* adj3 ablat*).tw.              | 540        |
| 8         | DAT.tw.                                 | 10949      |
| 9         | (tim* adj3 (ablat* and diagnos*)).tw.   | 2438       |
| 10        | ((diagnosis-to-ablation) adj3 time).tw. | 23         |
| 11        | 6 or 7 or 8 or 9 or 10                  | 17211      |
| <b>12</b> | <b>1 and 5 and 11</b>                   | <b>347</b> |

Cochrane (Search on Sept 3, 2019)

| #  | Searches                                | Results  |
|----|-----------------------------------------|----------|
| 1  | atrial fibrillation/                    | 4048     |
| 2  | catheter ablation/                      | 1391     |
| 3  | pulmonary veins/                        | 411      |
| 4  | radiofrequency ablation/                | 24       |
| 5  | 2 or 3 or 4                             | 1522     |
| 6  | (tim* adj3 ablat*).tw.                  | 9622     |
| 7  | (diagnos* adj3 ablat*).tw.              | 9622     |
| 8  | DAT.tw.                                 | 2        |
| 9  | (tim* adj3 (ablat* and diagnos*)).tw.   | 9622     |
| 10 | ((diagnosis-to-ablation) adj3 time).tw. | 9622     |
| 11 | 6 or 7 or 8 or 9 or 10                  | 9622     |
| 12 | <b>1 and 5 and 11</b>                   | <b>9</b> |

**Table S2. Risk of Bias Assessment**

| Study ID        | Selection                            |                                 |                           |                                           | Comparability            | Outcome               |                                |                              | Total<br>(★) |
|-----------------|--------------------------------------|---------------------------------|---------------------------|-------------------------------------------|--------------------------|-----------------------|--------------------------------|------------------------------|--------------|
|                 | Representativeness of exposed cohort | Selection of non-exposed cohort | Ascertainment of exposure | Outcome shown to be absent at study start | Comparability of cohorts | Assessment of Outcome | Adequacy of Follow up Duration | Adequacy of Cohort Follow Up |              |
| Bisbal (2019)   | A (★)                                | A (★)                           | A (★)                     | A (★)                                     | B (★)                    | A (★)                 | A (★)                          | D                            | 7            |
| Bunch (2013)    | A (★)                                | A (★)                           | A (★)                     | B                                         | B (★)                    | B (★)                 | B (★)                          | D                            | 6            |
| De Greef (2018) | A (★)                                | A (★)                           | A (★)                     | A (★)                                     | -                        | A (★)                 | A (★)                          | D                            | 6            |
| Hussein (2016)  | A (★)                                | A (★)                           | A (★)                     | A (★)                                     | -                        | A (★)                 | A (★)                          | D                            | 6            |
| Kawaji (2019)   | A (★)                                | A (★)                           | A (★)                     | A (★)                                     | B (★)                    | A (★)                 | A (★)                          | D                            | 7            |
| Lunati (2018)   | C                                    | A (★)                           | A (★)                     | A (★)                                     | -                        | A (★)                 | A (★)                          | D                            | 5            |

**Newcastle Ottawa Quality Assessment Form for Cohort Studies**

(Reference: Wells GA et al. *The Newcastle-Ottawa Scale (NOS) for assessing the quality of non-randomised studies in meta-analyses*. Available at [http://www.ohri.ca/programs/clinical\\_epidemiology/oxford.asp](http://www.ohri.ca/programs/clinical_epidemiology/oxford.asp))

Note: A study can be awarded a maximum of one star for each numbered item within the Selection and Outcome categories. A maximum of two stars can be given for comparability. Each star indicates higher quality within the domain being assessed.

**Selection**

1) Representativeness of the exposed cohort

- a) truly representative of the average \_\_\_\_\_ (describe) in the community ★
- b) somewhat representative of the average \_\_\_\_\_ in the community ★
- c) selected group of users eg nurses, volunteers
- d) no description of the derivation of the cohort

2) Selection of the non exposed cohort

- a) drawn from the same community as the exposed cohort ★

- b) drawn from a different source
- c) no description of the derivation of the non exposed cohort

3) Ascertainment of exposure

- a) secure record (eg surgical records) ★
- b) structured interview ★
- c) written self report
- d) no description

4) Demonstration that outcome of interest was not present at start of study (defined in the present study as successful pulmonary vein isolation with AF ablation)

- a) yes ★
- b) no

### Comparability

1) Comparability of cohorts on the basis of the design or analysis

- a) study controls for \_\_\_\_\_ (select the most important factor) ★
- b) study controls for any additional factor ★ (This criteria could be modified to indicate specific control for a second important factor.)

### Outcome

1) Assessment of outcome

- a) independent blind assessment ★
- b) record linkage ★
- c) self report
- d) no description

2) Was follow-up long enough for outcomes to occur

- a) yes (select an adequate follow up period for outcome of interest) ★
- b) no

3) Adequacy of follow up of cohorts

- a) complete follow up - all subjects accounted for ★
- b) subjects lost to follow up unlikely to introduce bias - small number lost - > \_\_\_\_ % (select an adequate %) follow up, or description provided of those lost) □
- c) follow up rate < \_\_\_\_% (select an adequate %) and no description of those lost
- d) no statement

**Table S3. Sensitivity Analysis with Stepwise Exclusion of Studies**

| <b>Excluded Study</b> | <b>Random Effects Pooled Relative Risk<br/>(95% Confidence Interval)</b> | <b>P value</b> | <b>Cochran's<br/>Q</b> | <b>I<sup>2</sup></b> |
|-----------------------|--------------------------------------------------------------------------|----------------|------------------------|----------------------|
| Bisbal (2019)         | 0.74 (0.65, 0.84)                                                        | <0.001         | 0.04                   | 59.1%                |
| Bunch (2013)          | 0.70 (0.63, 0.78)                                                        | <0.001         | 0.24                   | 26.2%                |
| De Greef (2018)       | 0.72 (0.62, 0.84)                                                        | <0.001         | 0.05                   | 58.2%                |
| Hussein (2016)        | 0.78 (0.71, 0.85)                                                        | <0.001         | 0.55                   | 0%                   |
| Kawaji (2019)         | 0.73 (0.62, 0.85)                                                        | <0.001         | 0.04                   | 60.1%                |
| Lunati (2018)         | 0.74 (0.65, 0.84)                                                        | <0.001         | 0.04                   | 59.9%                |
